# Supplementary material for: Nitrogen enriched polytriazine as a metal-free heterogeneous catalyst for the Knoevenagel reaction under mild conditions
Source: Royal Society of Chemistry journal article supplement (doi:10.1039/c8nj02174k), 2018-01-01
Supplement: c8nj02174k1.pdf [file c8nj02174k1.pdf]

**New Journal of Chemistry**

**Nitrogen enriched polytriazine as metal-free heterogeneous catalyst for the  
Knoevenagel reaction under mild conditions**

Monika Chaudhary and Paritosh Mohanty\*

Functional Materials Laboratory, Department of Chemistry, IIT Roorkee, Uttarakhand-  
247667, India

E-mail: [pmfcy@iitr.ac.in](mailto:pmfcy@iitr.ac.in), [paritosh75@gmail.com](mailto:paritosh75@gmail.com)

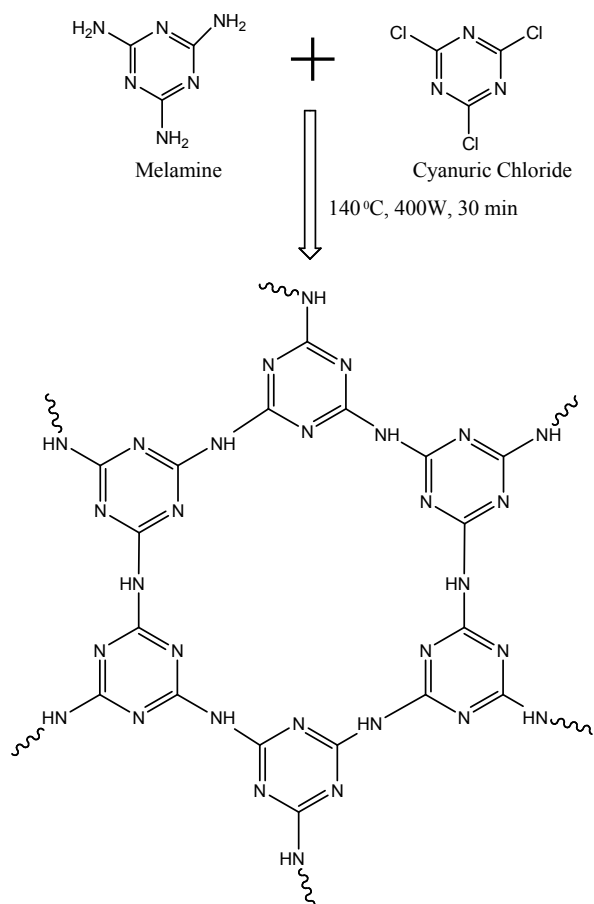

**Scheme S1.** Reaction scheme for the synthesis of metal-free nitrogen-enriched nanoporous polytriazine (NENP-1) organocatalyst.

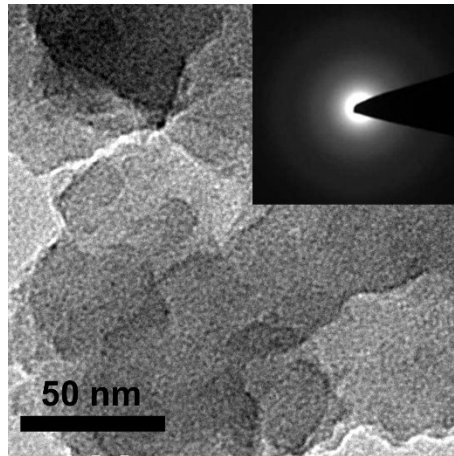

**Figure S1.** TEM image of NENP-1 (inset: SAED pattern of NENP-1).

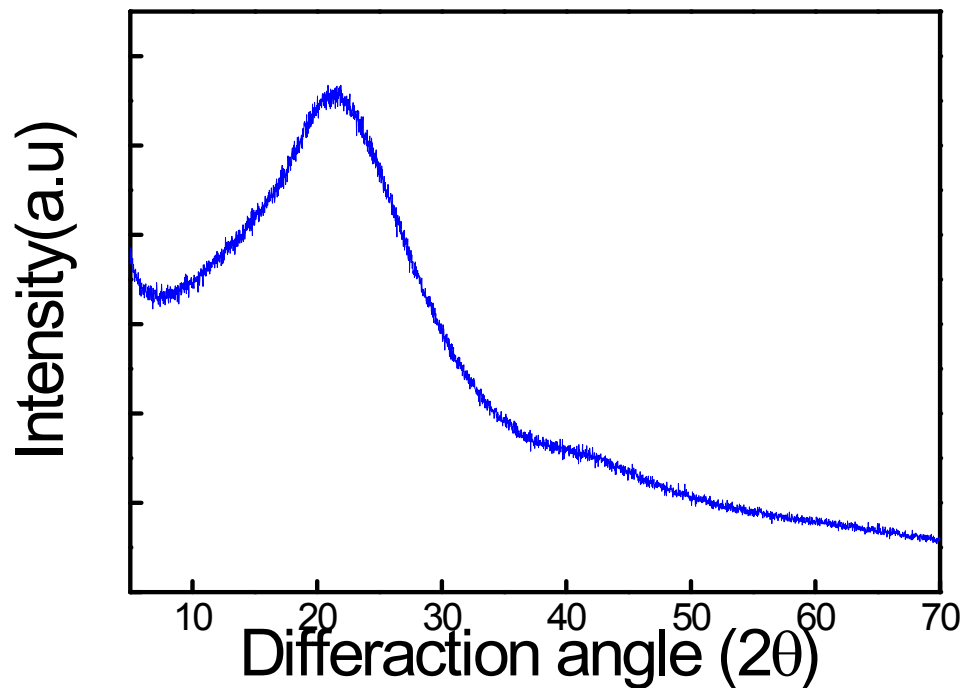

**Figure S2.** XRD pattern of NENP-1.

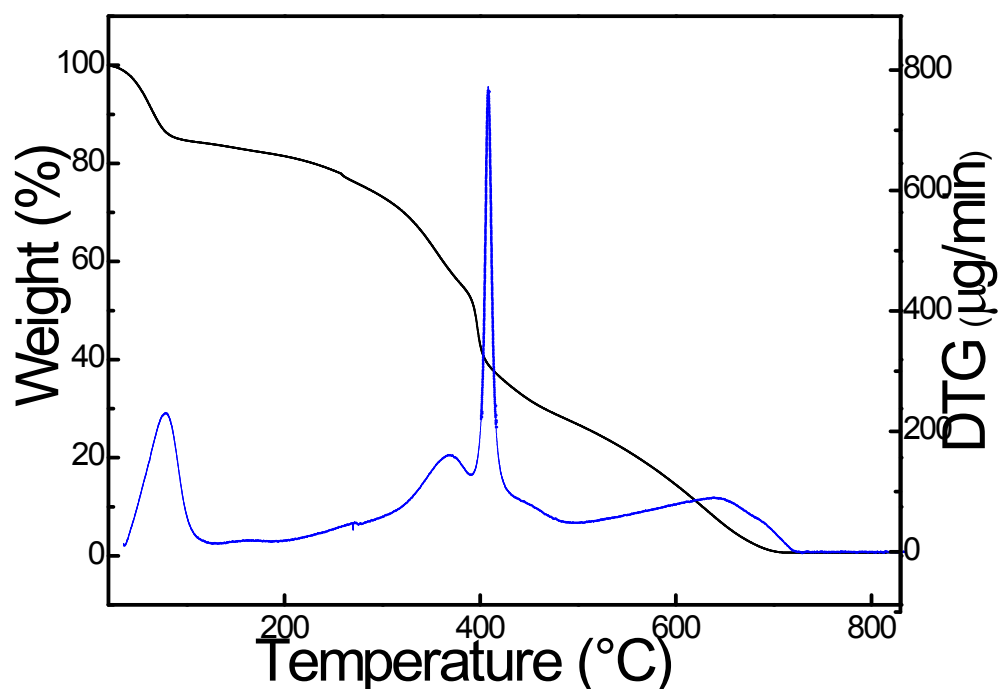

**Figure S3.** TGA/DTG of NENP-1 in air at a heating rate of 5 °C min<sup>-1</sup>.

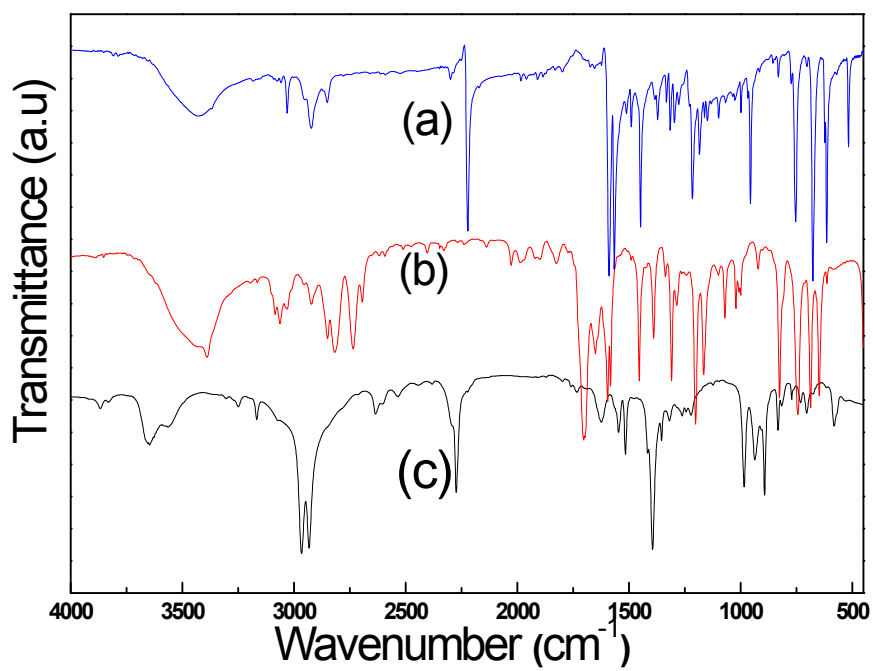

**Figure S4.** FT-IR spectra of (a) Benzylidinemalononitrile, (b) Benzaldehyde, and (c) Malononitrile.

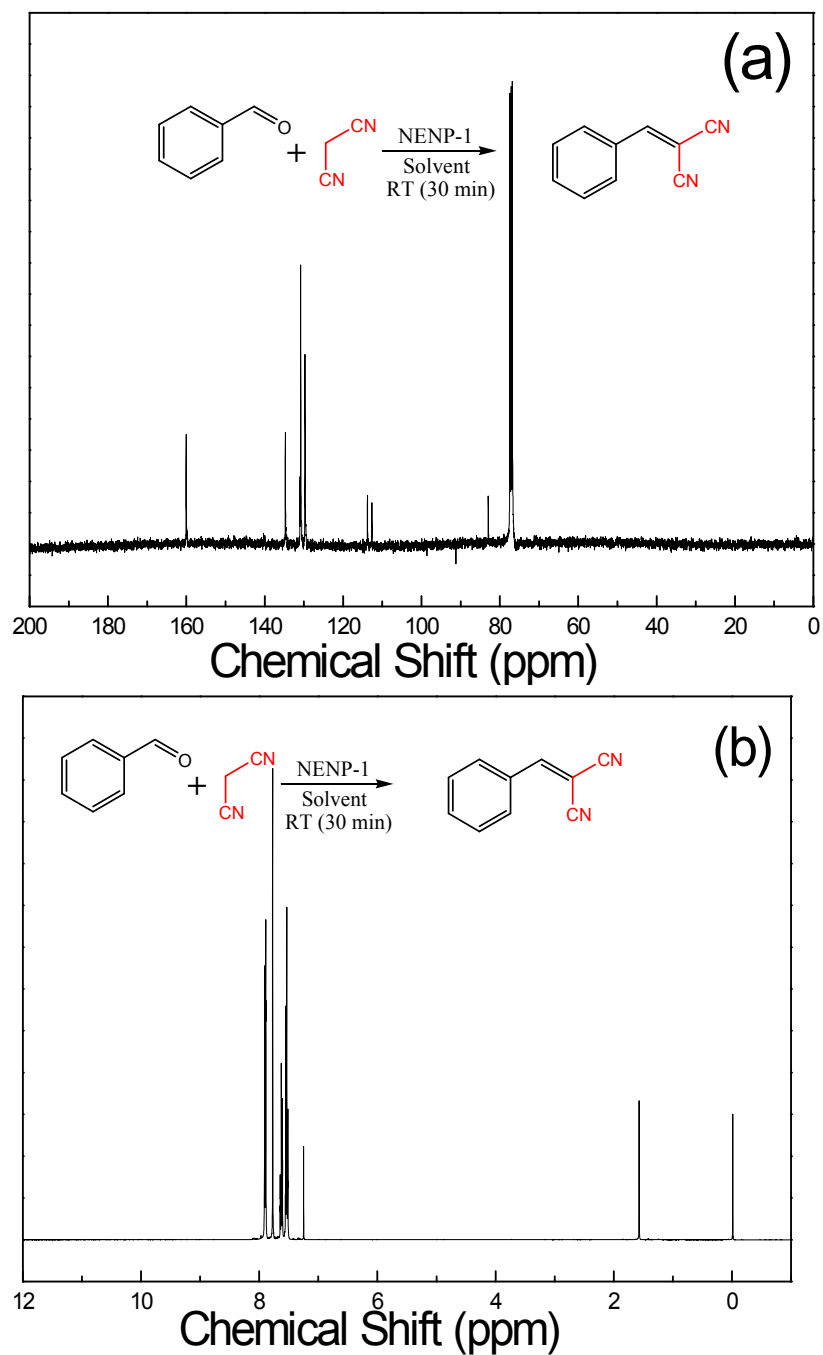

**Figure S5.** (a)  $^{13}\text{C}$  and (b)  $^1\text{H}$  NMR spectra of benzylidinemalononitrile.

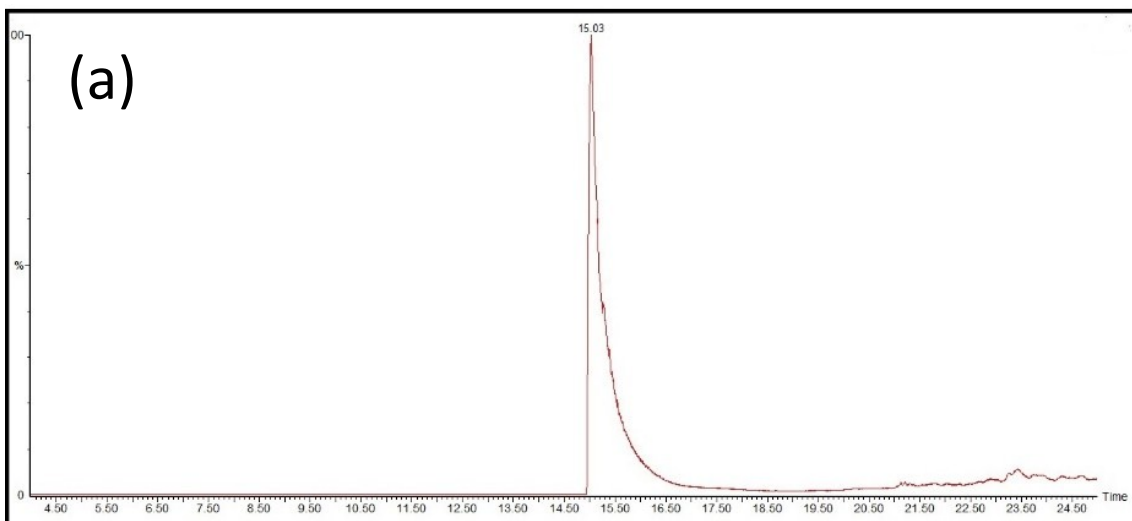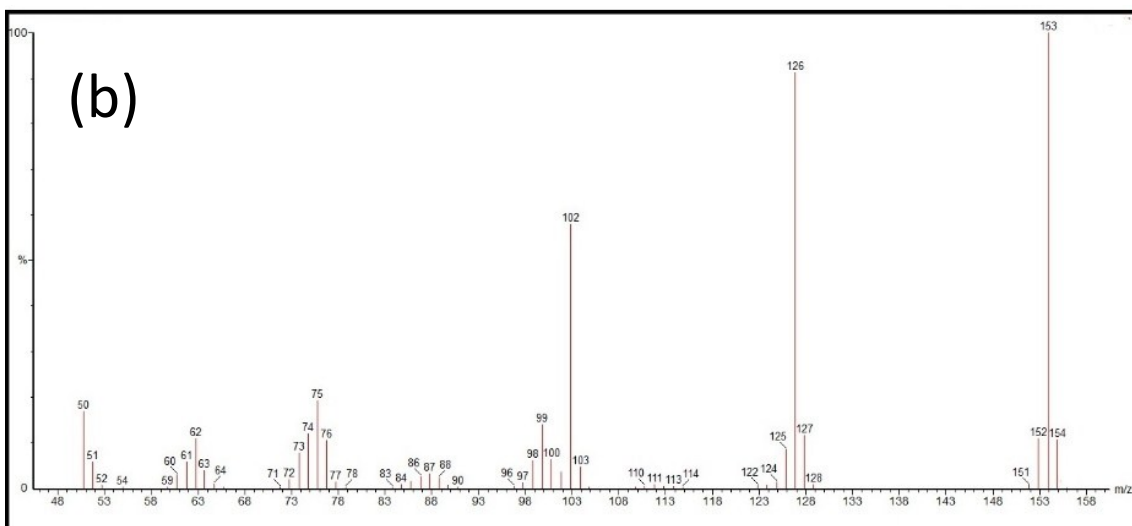

**Figure S6.** (a) GC and (b) MS spectrum of benzylidinemalononitrile.

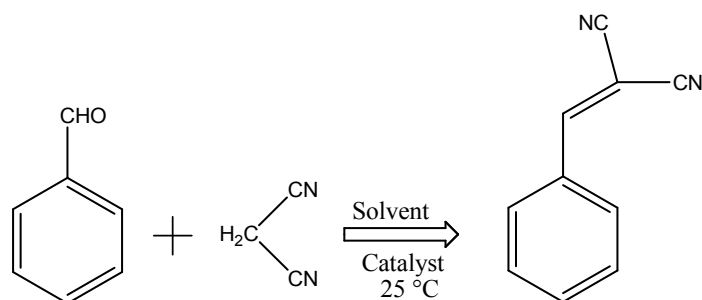

**Scheme S2.** Synthesis of benzylidinemalononitrile from benzaldehyde and malononitrile.

**Table S1.** Catalytic data of the NENP-1 catalysed model Knoevenagel reaction at various reaction conditions.

| Solvent                   | Volume (mL/mL) | Time (min) | Catalyst amount (wt%) | Yield (%) |
|---------------------------|----------------|------------|-----------------------|-----------|
| THF                       | 1.0/0          | 30         | 4.5                   | 37        |
| THF/H <sub>2</sub> O      | 0.5/0.5        | 30         | 4.5                   | 95        |
| Methanol                  | 1.0/0          | 30         | 4.5                   | 85        |
| Methanol/H <sub>2</sub> O | 0.5/0.5        | 30         | 4.5                   | 94        |
| Ethanol                   | 1.0/0          | 30         | 4.5                   | 87        |
| Ethanol/H <sub>2</sub> O  | 0.5/0.5        | 30         | 4.5                   | 93        |
| H <sub>2</sub> O          | 1.0/0          | 30         | 4.5                   | 48        |
| Dioxane                   | 1.0/0          | 30         | 4.5                   | 41        |
| Dioxane/H <sub>2</sub> O  | 0.5/0.5        | 30         | 4.5                   | 98        |
| Dioxane/H <sub>2</sub> O  | 0.5/0.5        | 30         | 1.9                   | 35        |
| Dioxane/H <sub>2</sub> O  | 0.5/0.5        | 90         | 1.9                   | 46        |
| Dioxane/H <sub>2</sub> O  | 0.5/0.5        | 30         | 8.6                   | 98        |
| Dioxane/H <sub>2</sub> O  | 0.5/0.5        | 10         | 8.6                   | 75        |
| Dioxane/H <sub>2</sub> O  | 0.5/0.5        | 02         | 4.5                   | 45        |
| Dioxane/H <sub>2</sub> O  | 0.5/0.5        | 05         | 4.5                   | 60        |
| Dioxane/H <sub>2</sub> O  | 0.5/0.5        | 10         | 4.5                   | 71        |

**General conditions:** Benzaldehyde (1.0 mmol), Malononitrile (1.0 mmol) at 25 °C.



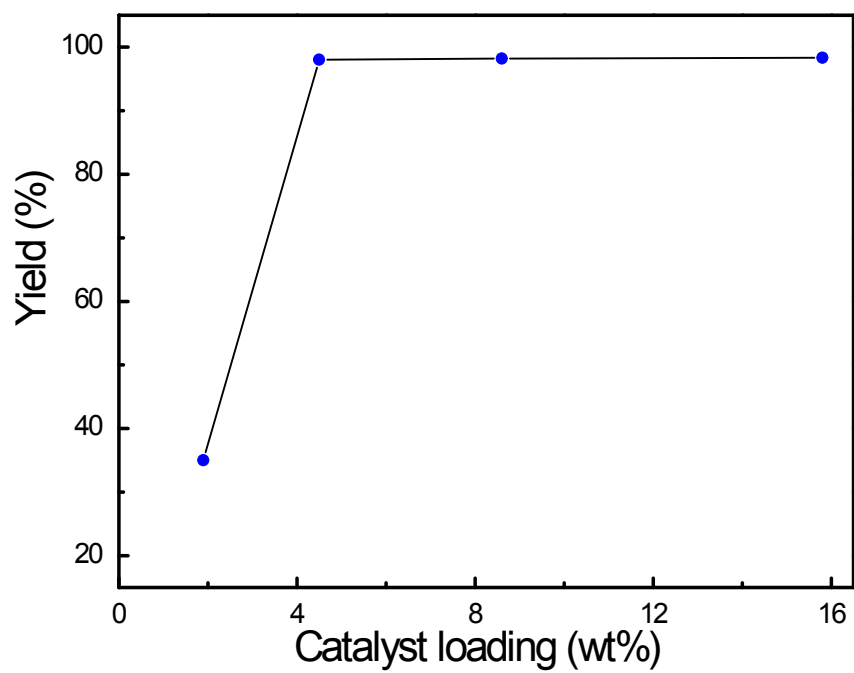

**Figure S7.** Effect of catalyst loading on yield (%) of benzyldinmalononitrile.

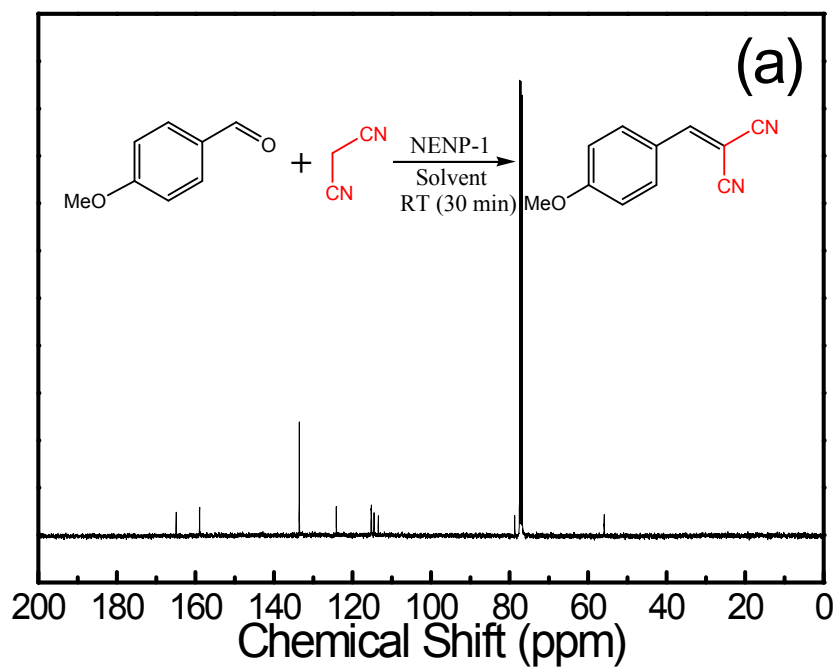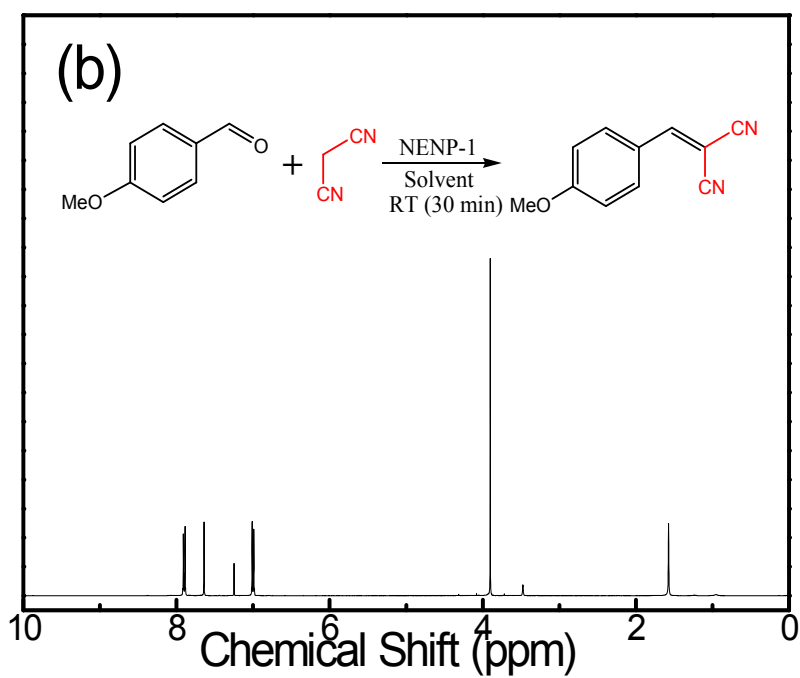

**Figure S8.** (a)  $^{13}\text{C}$  and (b)  $^1\text{H}$  spectra NMR spectra of 4-methoxy benzylidene malononitrile.

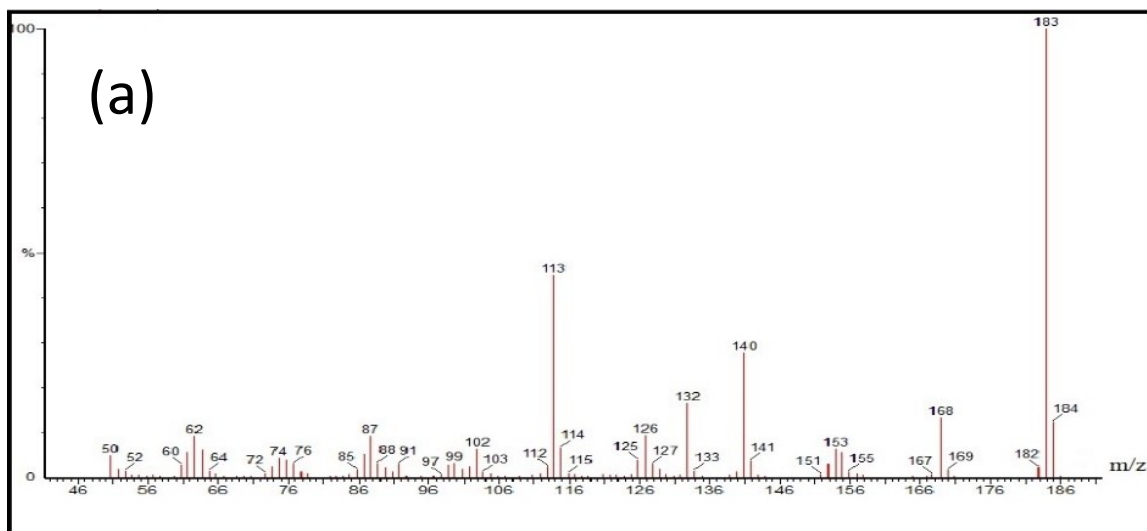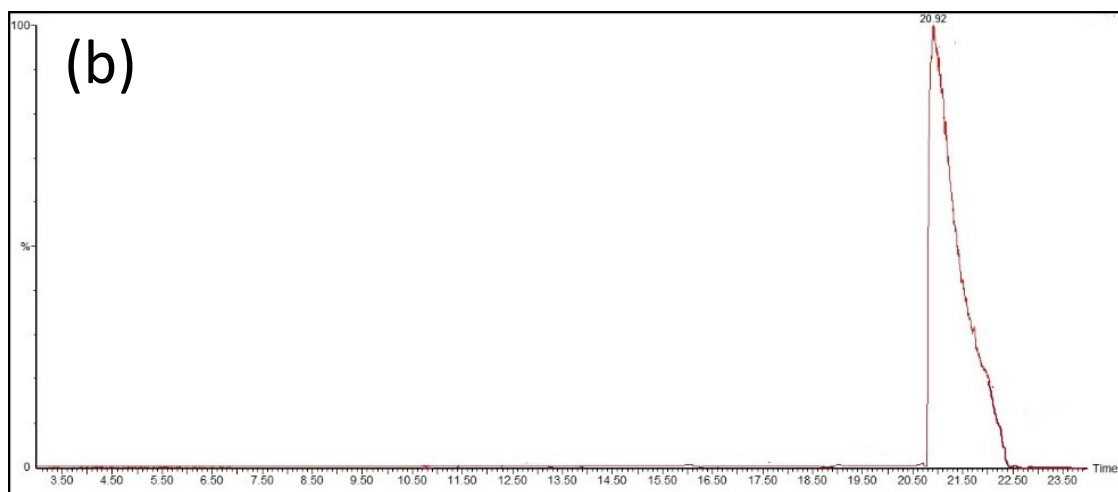

**Figure S9.** (a) GC and (b) MS spectrum of 4-methoxy benzylidinemalononitrile.

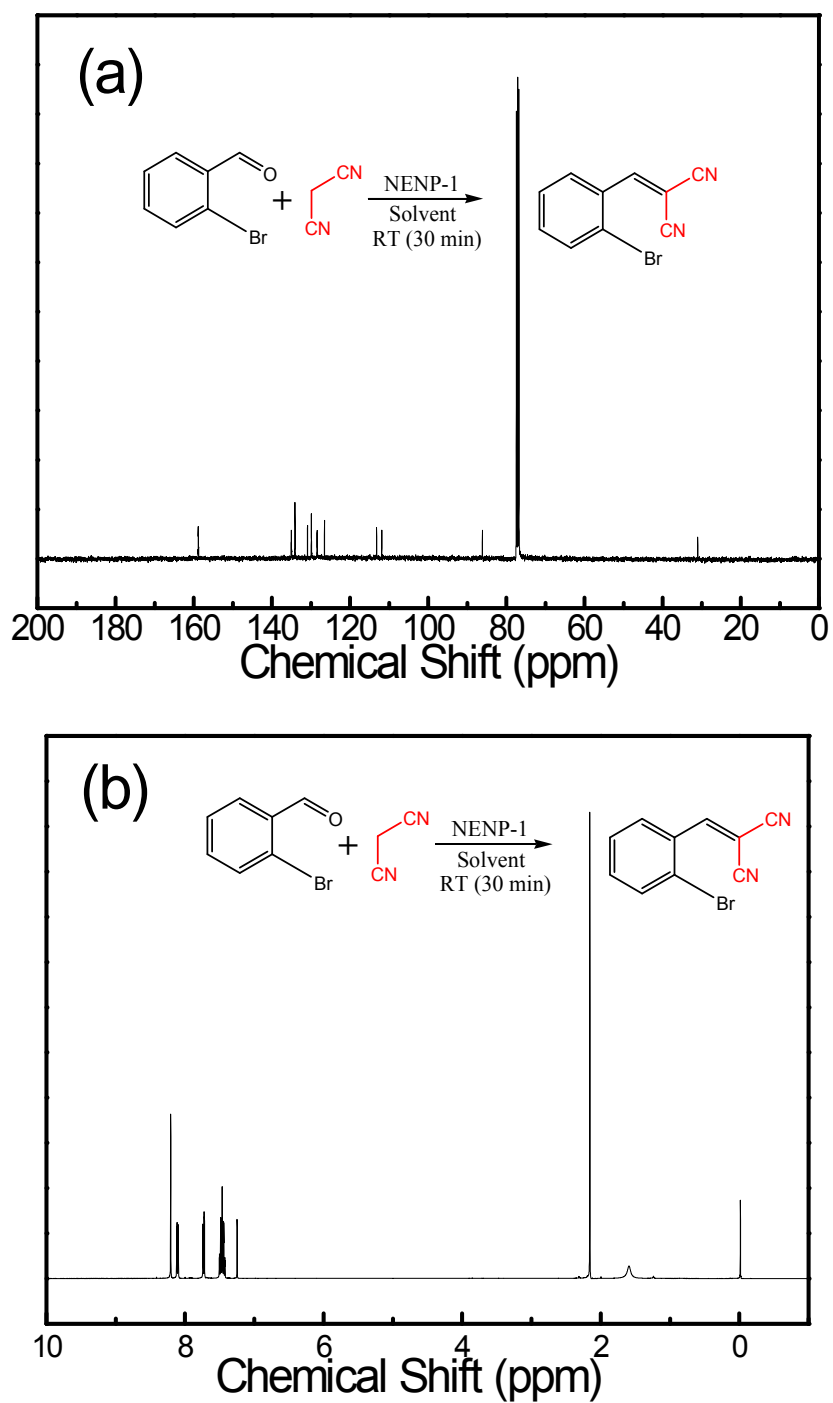

**Figure S10.** (a)  $^{13}\text{C}$  and (b)  $^1\text{H}$  NMR spectra of 2-bromobenzylidene malononitrile.

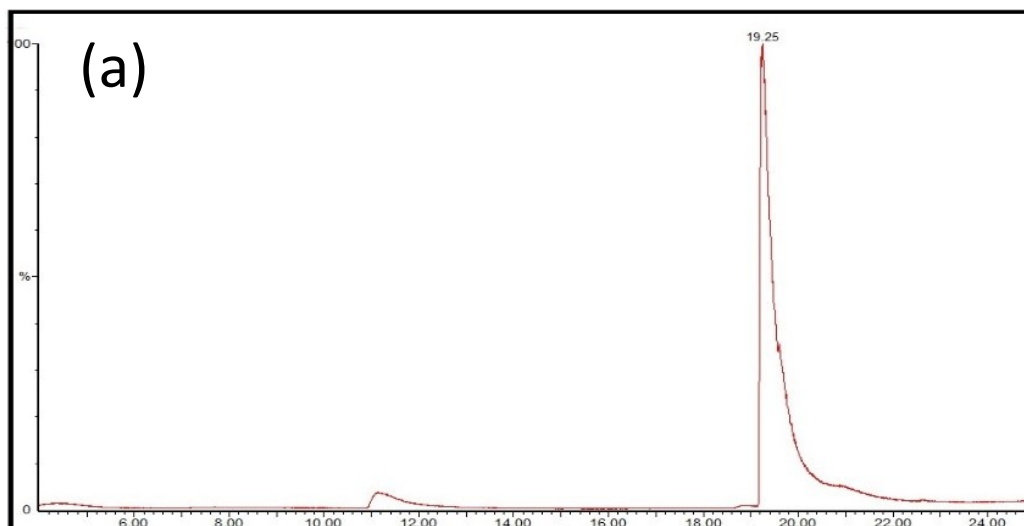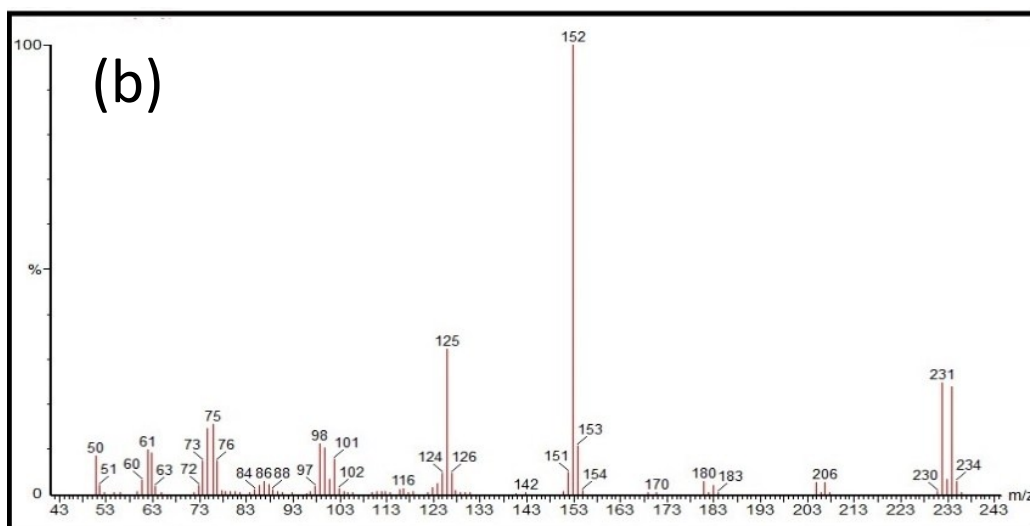

**Figure S11.** (a) GC and (b) MS spectrum of 2-bromobenzylidinemalononitrile.

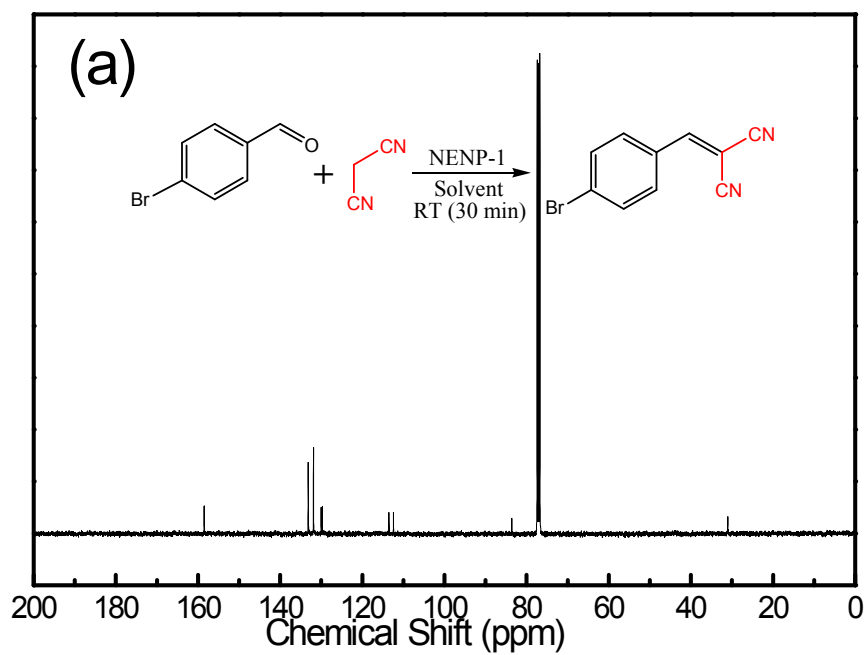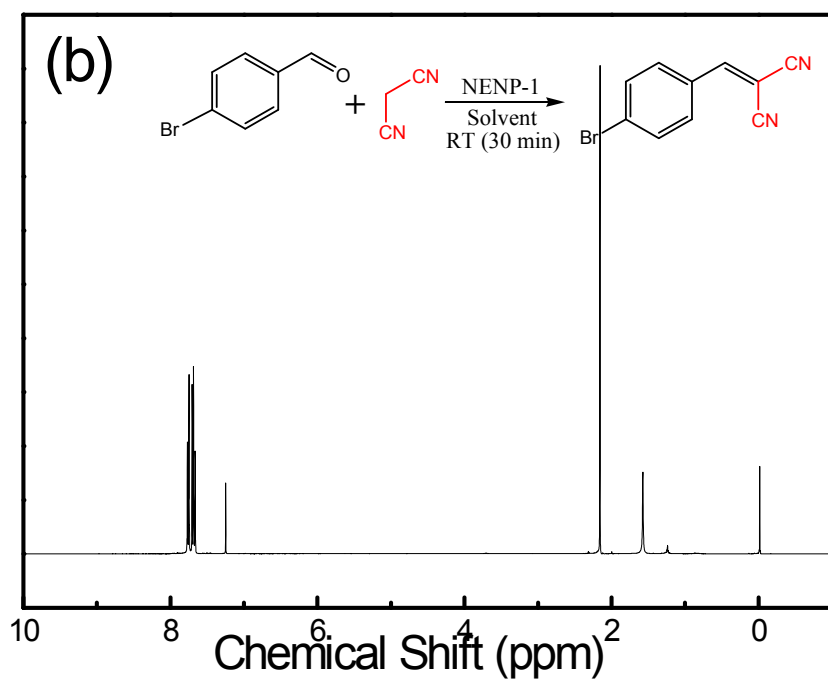

**Figure S12.** (a)  $^{13}\text{C}$  and (b)  $^1\text{H}$  NMR spectra of 4-bromobenzylidene malononitrile.

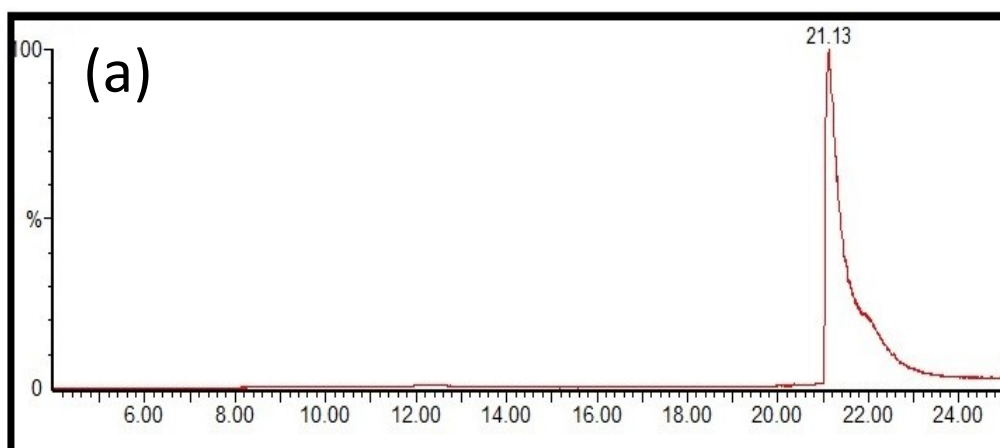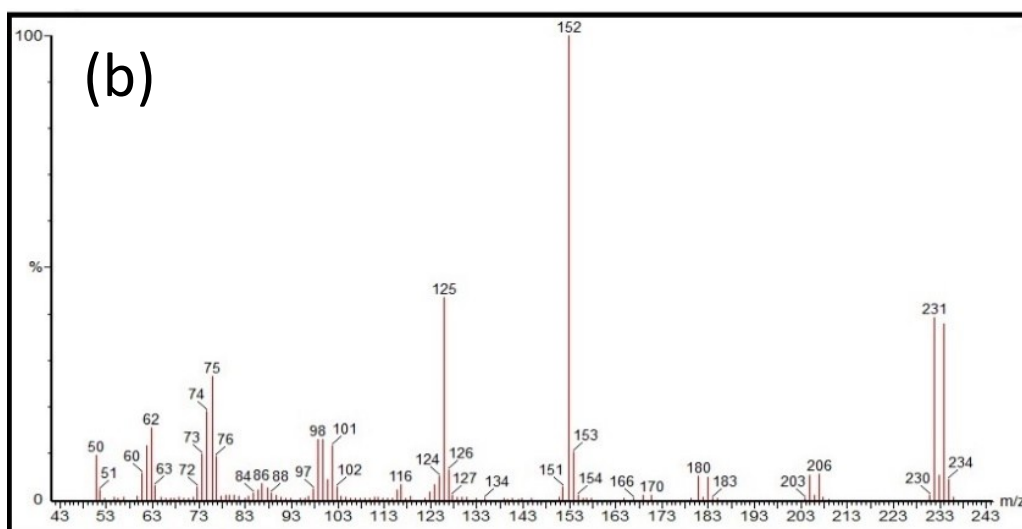

**Figure S13.** (a) GC (b) MS spectrum of 4-bromobenzylidinemalononitrile.

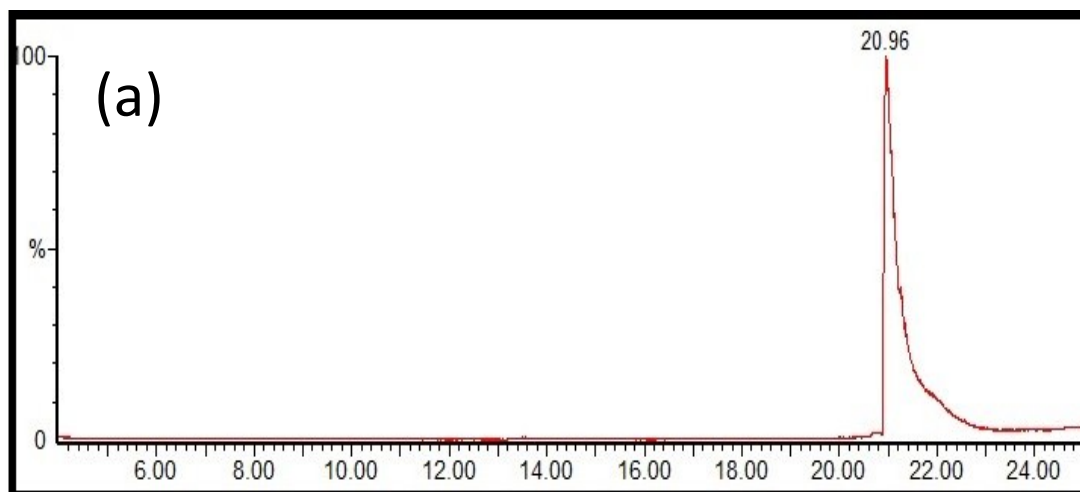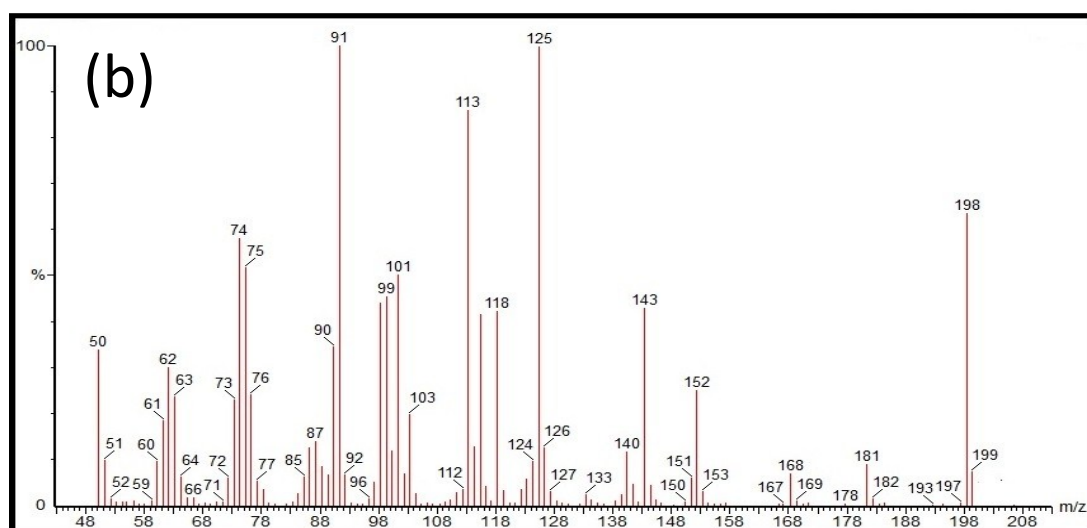

**Figure S14.** (a) GC and (b) MS spectrum of 2-nitrobenzylidinemalononitrile.



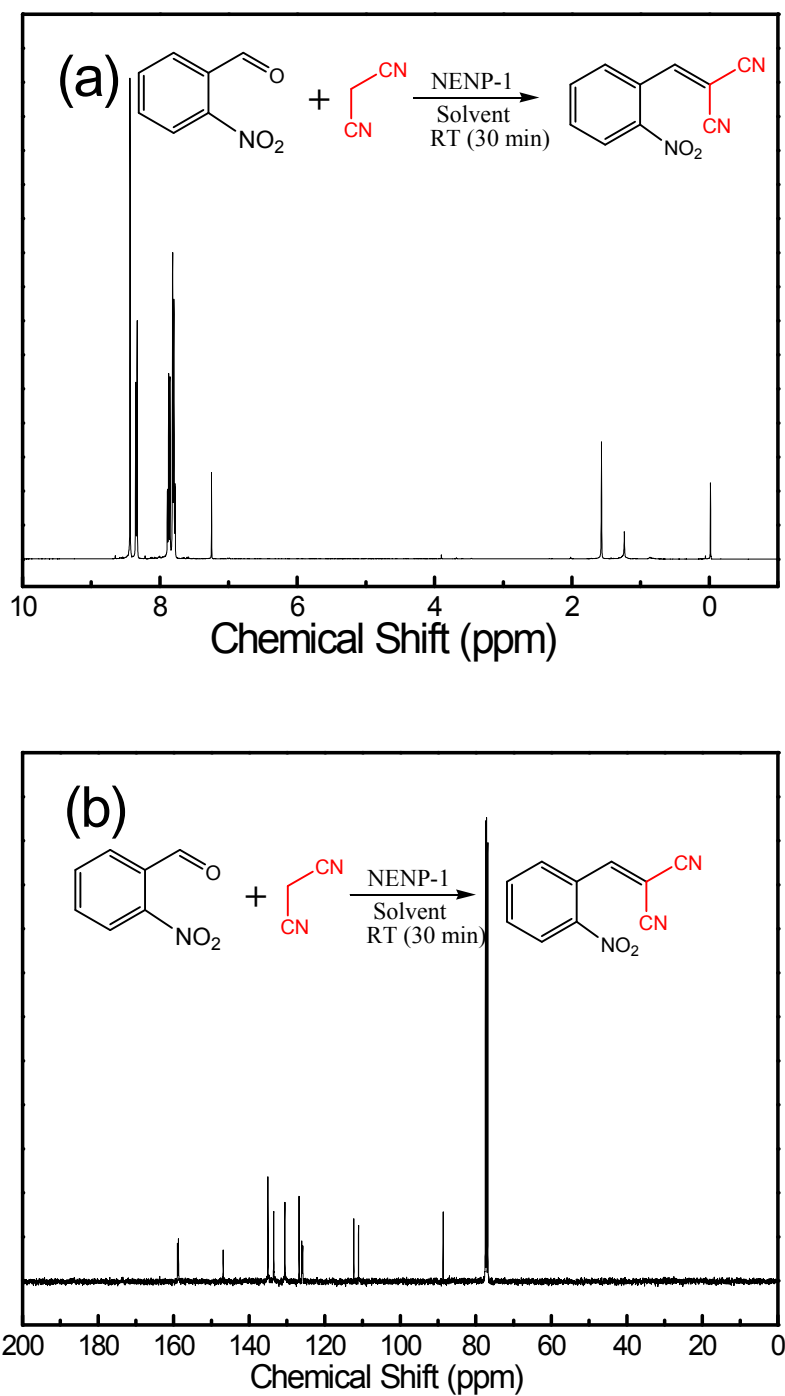

**Figure S15.** (a)  $^1\text{H}$  and (b)  $^{13}\text{C}$  NMR spectra of 2-nitrobenzylidene malononitrile.

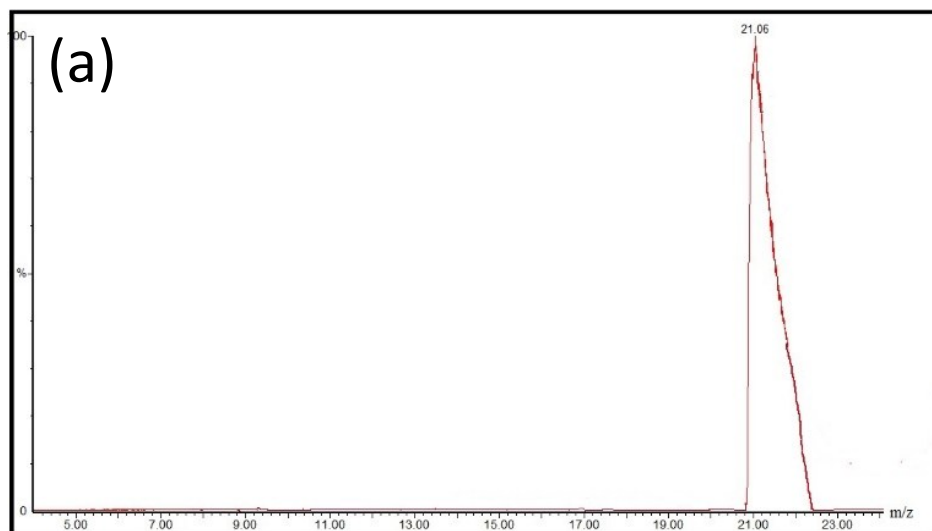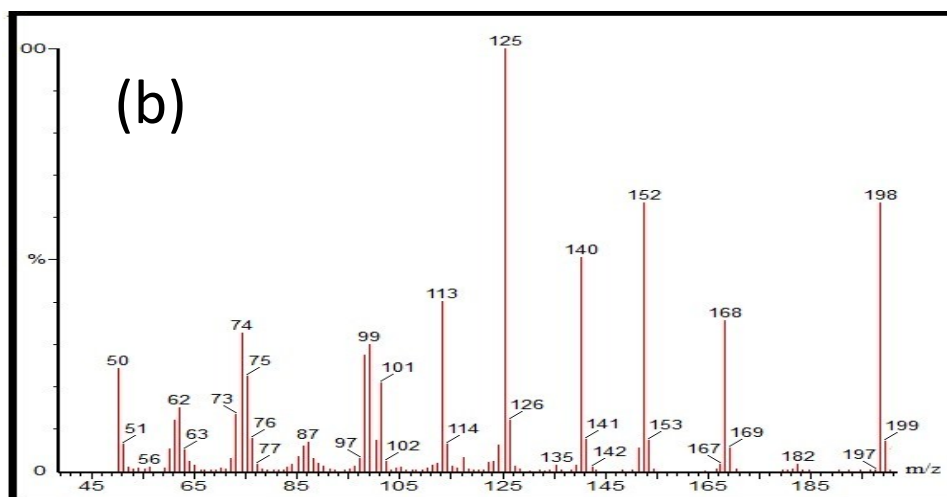

**Figure S16.** (a) GC and (b) MS spectrum of 4-nitrobenzylidinemalononitrile.

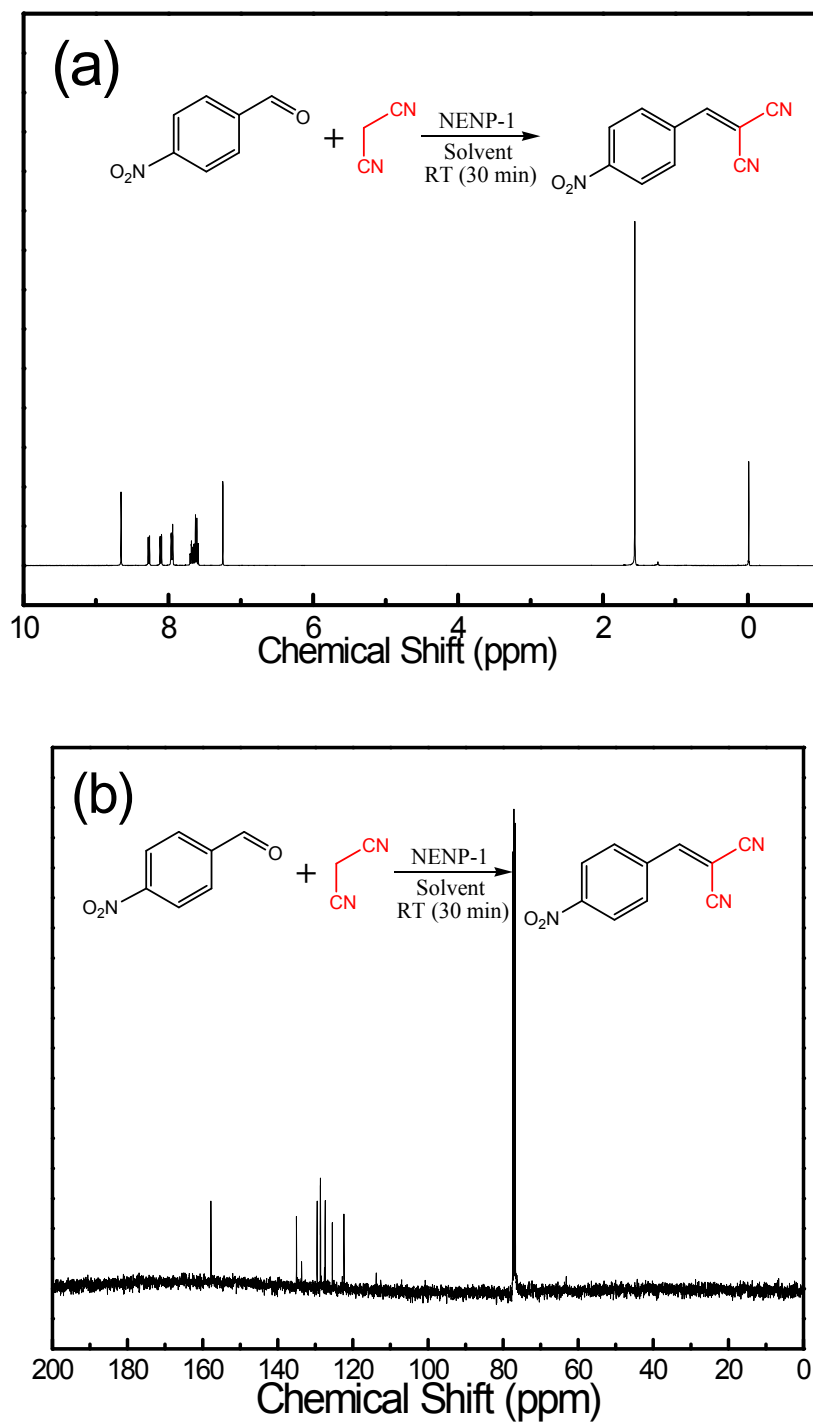

**Figure S17.** (a)  $^1\text{H}$  and (b)  $^{13}\text{C}$  NMR spectra of 4-nitrobenzylidene malononitrile.

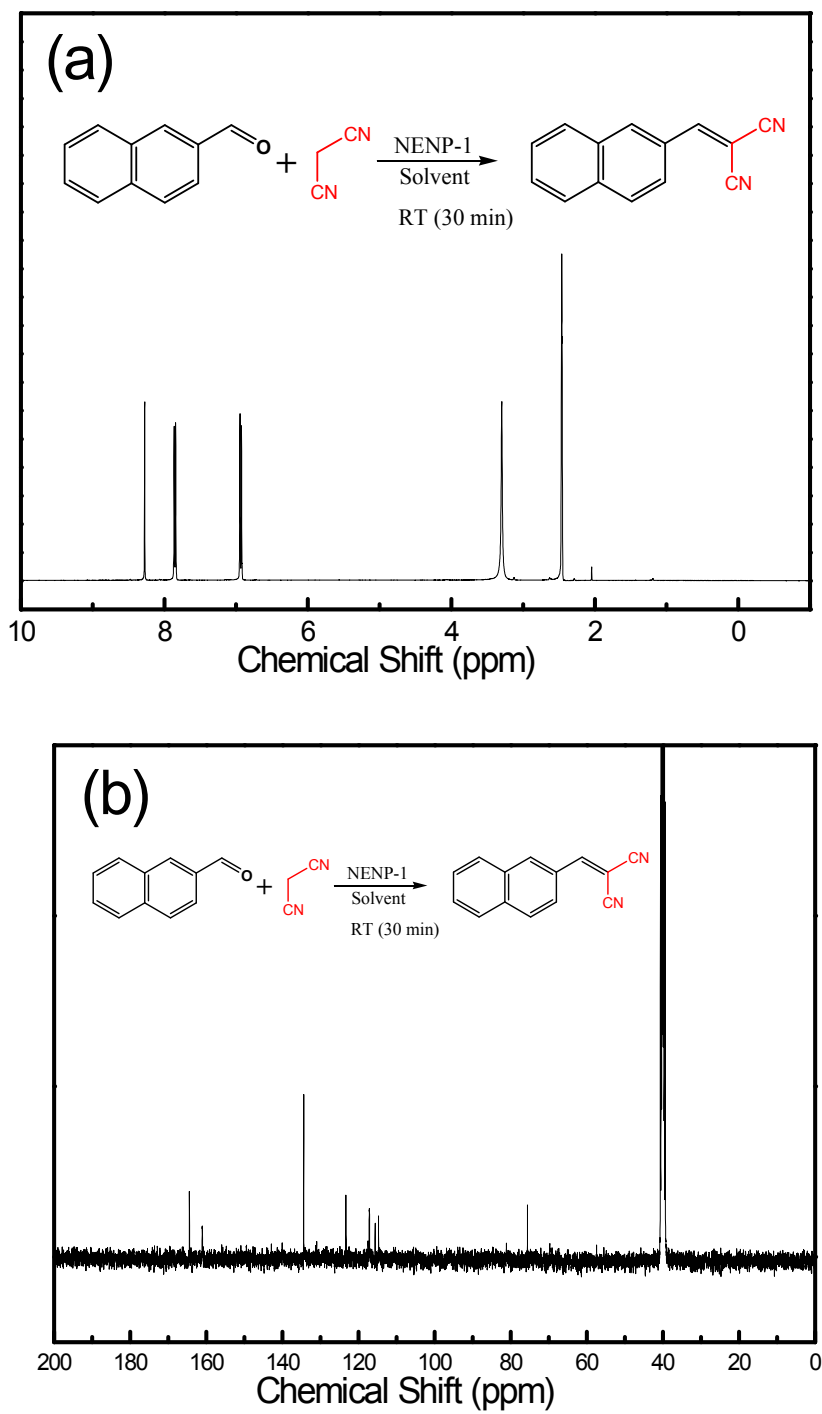

**Figure S18.** (a) <sup>1</sup>H and (b) <sup>13</sup>C NMR spectra of  $\alpha$ -Naphthaldehyde.

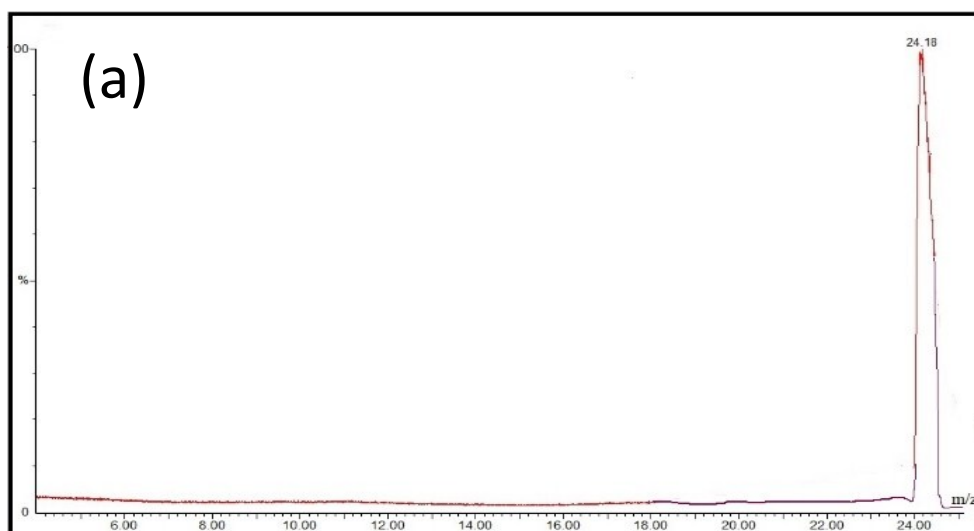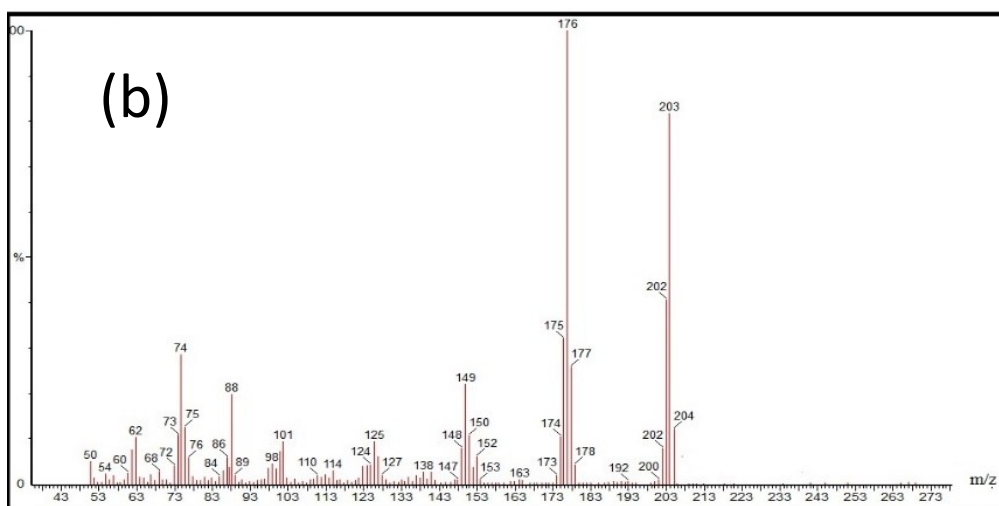

**Figure S19.** (a) GC and (b) MS spectrum of  $\alpha$ -Naphthaldehyde.

**Table S2.** Comparison of experimental conditions for the synthesis of metal-free heterogeneous organocatalysts and their catalytic performance in Knoevenagel reaction.

| Organocatalysts                 | Synthesis conditions                   |                  |            | Catalysis        |            |           | References                 |
|---------------------------------|----------------------------------------|------------------|------------|------------------|------------|-----------|----------------------------|
|                                 | Synthesis method                       | Temperature (°C) | Time (h)   | Temperature (°C) | Time (min) | Yield (%) |                            |
| MFCMP-1                         | Oxidative coupling polymerization      | 60               | 72         | 25               | 240        | 99        | S1                         |
| JUC-Z12                         | Oxidative cyclo-dehydrogenation        | 130              | 72         | 25               | 1440       | 97        | S2                         |
| BF-COF-1                        | Schiff base condensation               | 120              | 120        | 25               | 600        | 96        | S3                         |
| MPU                             | Solvothermal synthesis                 | 150              | 72         | 50               | 840        | 98        | S4                         |
| MCN                             | Carbonization                          | 550              | 3          | 120              | 12         | 95        | S5                         |
| g-C <sub>3</sub> N <sub>4</sub> | Thermal condensation                   | 550              | 8          | 40               | 120        | 98        | S6                         |
| PANF                            | Thermal condensation                   | 145              | 6          | 70               | 90         | 97        | S7                         |
| <b>NENP-1</b>                   | <b>Microwave-assisted condensation</b> | <b>140</b>       | <b>0.5</b> | <b>25</b>        | <b>30</b>  | <b>98</b> | <i><b>Current work</b></i> |

## References

- S1. Y. Zhang, S. A, Y. Zou, X. Luo, Z. Li, H. Xia, X. Liu and Y. Mua, *J. Mater. Chem. A*, 2014, **2**, 13422-13430.
- S2. B. Liu, T. Ben, J. Xu, F. Deng and S. Qiu, *New J. Chem.*, 2014, **38**, 2292-2299.
- S3. Q. Fang, S. Gu, J. Zheng, Z. Zhuang, S. Qiu, and Y. Yan, *Angew. Chem. Int. Ed.*, 2014, **53**, 2878 - 2882.
- S4. S. K. Dey, N. D. S. Amadeu and C. Janiak, *Chem. Commun.*, 2016, **52**, 7834-7837.
- S5. M. B. Ansari, H. Jin, M. N. Parvin and S. Park, *Catal. Today*, 2012, **185**, 211-216.
- S6. L. Zhang, H. Wang, W. Shen, Z. Qin, J. Wang and W. Fan, *J. Catal.*, 2016, **344**, 293-302.
- S7. G. Li, J. Xiao and W. Zhang, *Green Chem.*, 2011, **13**, 1828-1836.
